# Supplementary material for: Exploring the valleytronic, optical, and piezoelectric properties of Janus MoBXY2 (X = N, P; Y = S, Se, Te) monolayers for multifunctional applications
Source: Royal Society of Chemistry journal article supplement (doi:10.1039/d4cp03793f), 2024-01-01
Supplement: d4cp03793f1.pdf [file d4cp03793f1.pdf]

## Supplementary Material for "Theoretical studies of valleytronic, optical and piezoelectric properties in Janus MoBXY<sub>2</sub> (X = N, P; Y = S, Se, Te) monolayers"

Luogang Xie, Haiyang Dai, and Yang Yang\*

*College of Physics and Electronic Engineering, Zhengzhou University of Light Industry, Zhengzhou 450002, China and  
Henan Key Laboratory of Magneto-electronic Information Functional Materials, Zhengzhou 450002, China*

Hong-Yan Lu

*School of Physics and Physical Engineering, Qufu Normal University, Qufu 273165, China*

Content:

Fig. S1: AIMD simulation results concerning MoBNSe<sub>2</sub> and MoBNTe<sub>2</sub> monolayers.

Fig. S2: Phonon spectra computed for MoBNSe<sub>2</sub> and MoBNTe<sub>2</sub> monolayers.

Fig. S3: The electronic structures of MoBNSe<sub>2</sub> and MoBNTe<sub>2</sub> monolayers obtained using the HSE functional.

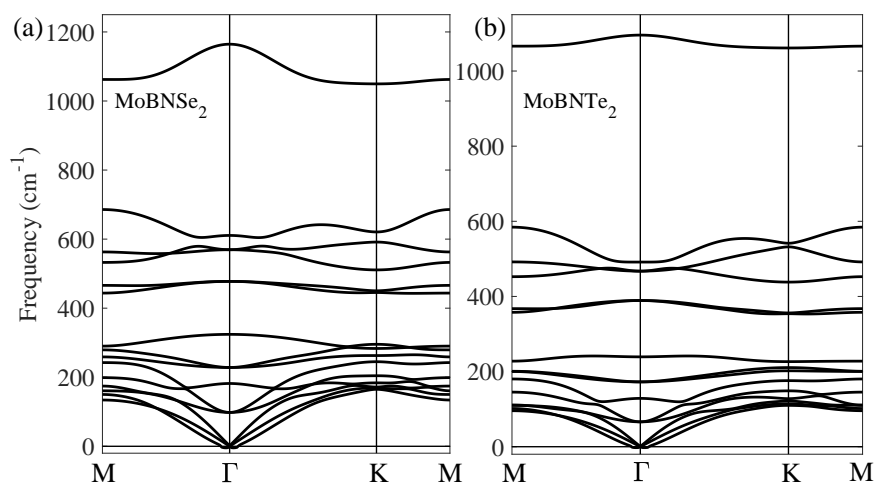

FIG. S1: Phonon dispersion spectrum of monolayer MoBNSe<sub>2</sub> (a) and MoBNTe<sub>2</sub> (b).

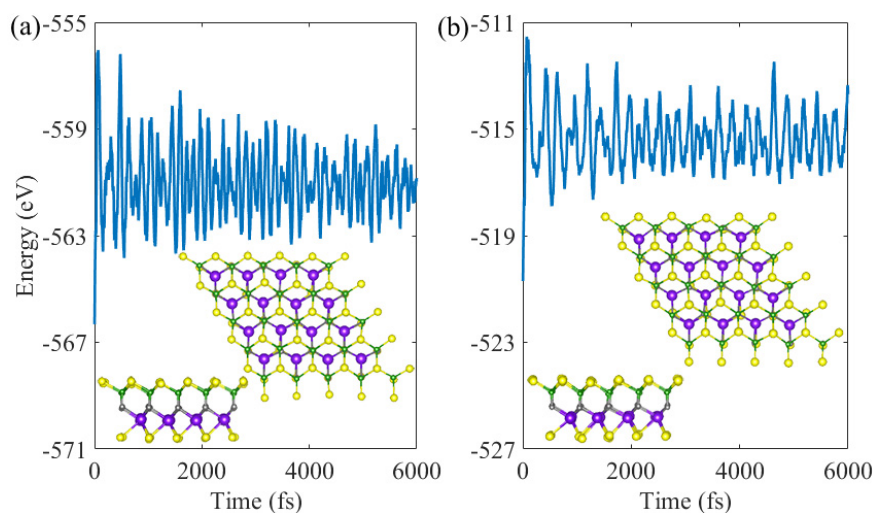

FIG. S2: Total energy fluctuations of MoBNSe<sub>2</sub> (a) and MoBNTe<sub>2</sub> (b) during AIMD simulations, with snapshots after 6 ps at 500 K shown in the insets.

\*Electronic address: yyphysics@zzuli.edu.cn

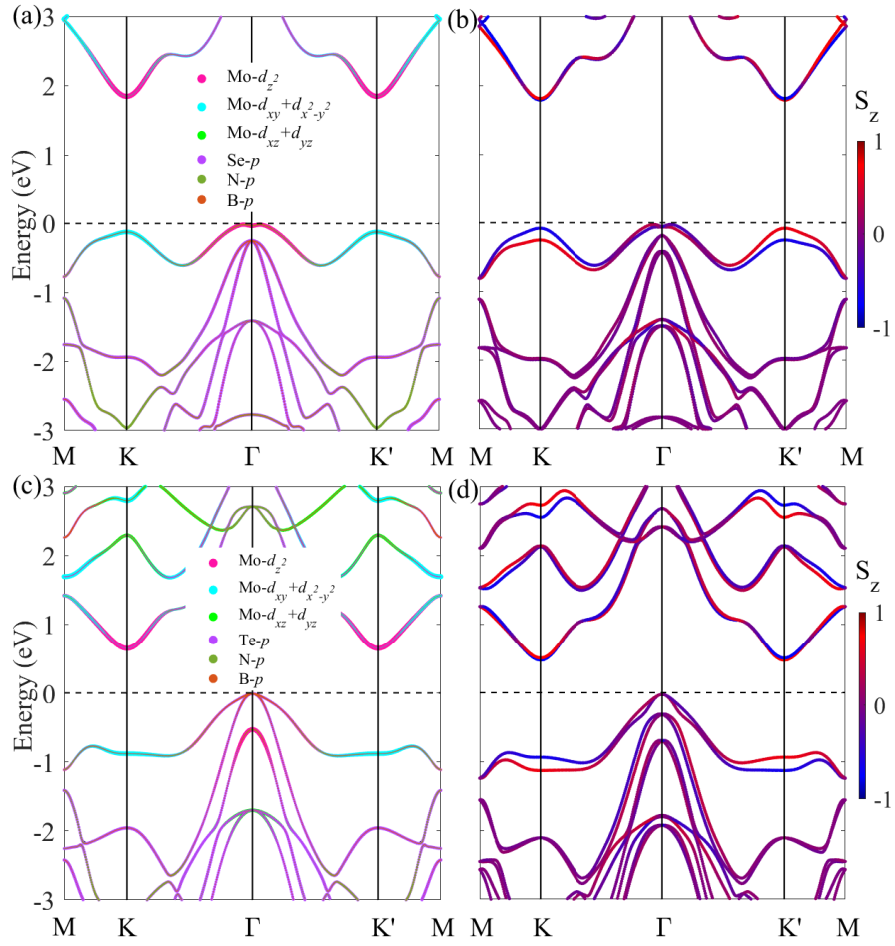

FIG. S3: Orbital-resolved band structures of monolayer MoBNSe<sub>2</sub> (a) and MoBNTe<sub>2</sub> (c) without considering SOC. Spin-resolved band structures of monolayer MoBNSe<sub>2</sub> (b) and MoBNTe<sub>2</sub> (d) with considering SOC, where red and blue lines indicate spin-up and spin-down states.
